# Supplementary material
Source: PubMed Central journal article supplement (PMC3416103)
Supplement: JVI.00852-12_zjv999096443so1.pdf [file JVI.00852-12_zjv999096443so1.pdf]

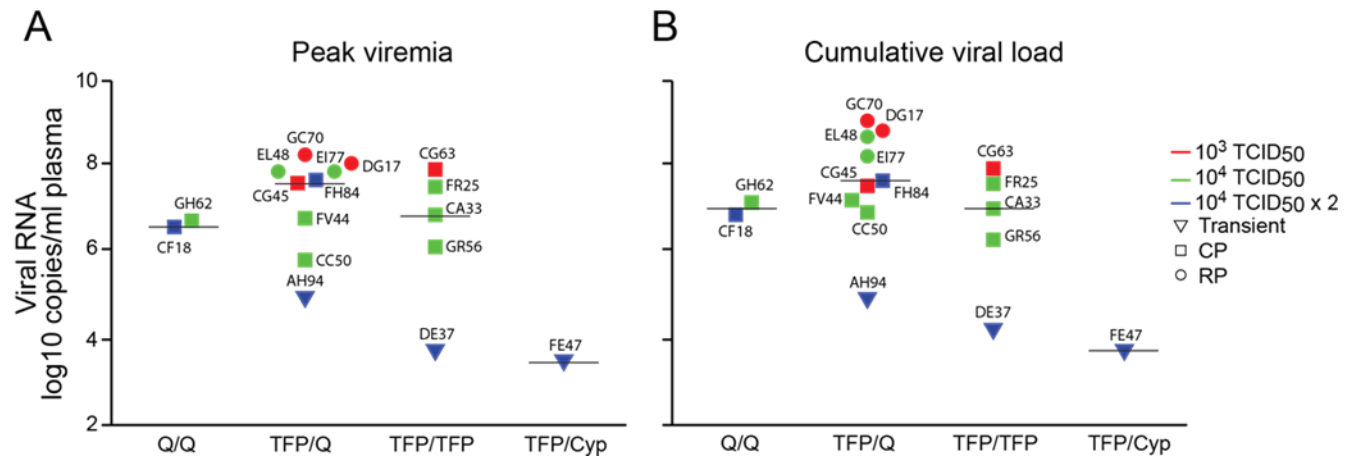

**Supplementary Figure 1.** Effect of TRIM5a variants on SHIV replication. Ivag-exposed animals were divided based on expression of selected TRIM5 alleles, and were evaluated for **(A)** peak viremia and **(B)** RNA levels during the first year of infection. The symbols represent different infection status: transient viremia (transient), chronic progressor (CP) and rapid progressor (RP), and the colors designate the virus dose. The line represents the median viral RNA copies for each group. There was no significant difference in peak or cumulative load for infected animals expressing the restrictive homozygous TFP/TFP and the permissive heterozygous TFP/Q allele ( $p > 0.05$ ).
